1 **Thyroid hormone receptor beta inhibits the PI3K-Akt-mTOR signaling axis in anaplastic**  
2 **thyroid cancer via genomic mechanisms**

3 Authors: Cole D. Davidson <sup>1,2</sup>, Eric L. Bolf <sup>1,2</sup>, Noelle E. Gillis <sup>1,2</sup>, Lauren M. Cozzens <sup>1</sup>, Jennifer A.  
4 Tomczak <sup>1</sup>, and Frances E. Carr <sup>1,2,\*</sup>

5 <sup>1</sup> *Department of Pharmacology, Larner College of Medicine, Burlington, Vermont.*

6 <sup>2</sup> *University of Vermont Cancer Center, Burlington, Vermont.*

7 \* *Corresponding author, Email: Frances.Carr@med.uvm.edu*

8 Short title: TR $\beta$  Inhibits PI3K Signaling via Genomic Mechanisms

9 Keywords: Anaplastic thyroid cancer, PI3K, PI3K inhibitor, thyroid hormone receptor, receptor  
10 tyrosine kinase, PI3K phosphatase

11 **Cole D. Davidson:** Conceptualization, Formal analysis, Investigation, Writing – Original draft  
12 preparation, Visualization. **Eric L. Bolf:** Conceptualization, Formal analysis, Investigation,  
13 Writing – Review & editing. **Noelle E. Gillis:** Formal analysis, Investigation, Writing – Review &  
14 editing. **Lauren M. Cozzens:** Formal analysis, Investigation. **Jennifer A. Tomczak:** Investigation,  
15 Writing – Review & editing. **Frances E. Carr:** Resources, Writing – Review & editing, Supervision,  
16 Project administration, Funding acquisition.

17 The research reported here was supported by grants from National Institutes of Health U54  
18 GM115516 for the Northern New England Clinical and Translational Research Network;  
19 National Cancer Institute 1F99CA245796-01; UVM Cancer Center-Lake Champlain Cancer  
20 Research Organization (C3) 12577-21; and UVM Larner College of Medicine.

21 No potential conflicts of interest were disclosed.

22

23 **Abstract:**

24 Thyroid cancer is the most common endocrine malignancy, and the global incidence has  
25 increased rapidly over the past few decades. Anaplastic thyroid cancer (ATC) is highly  
26 aggressive, dedifferentiated, and patients have a median survival of fewer than six months.  
27 Oncogenic alterations in ATC include aberrant PI3K signaling through receptor tyrosine kinase  
28 (RTK) amplification, loss of phosphoinositide phosphatase expression and function, and Akt  
29 amplification. Furthermore, the loss of expression of the tumor suppressor thyroid hormone  
30 receptor beta (TR $\beta$ ) is strongly associated with ATC. TR $\beta$  is known to suppress PI3K in follicular  
31 thyroid cancer and breast cancer by binding to the PI3K regulatory subunit p85 $\alpha$ . However, the  
32 role of TR $\beta$  in suppressing PI3K signaling in ATC is not completely delineated. Here we report  
33 that TR $\beta$  indeed suppresses PI3K signaling in ATC through unreported genomic mechanisms  
34 including a decrease in RTK expression and increase in phosphoinositide and Akt phosphatase  
35 expression. Furthermore, the reintroduction and activation of TR $\beta$  in ATC enables an increase in  
36 the efficacy of the competitive PI3K inhibitors LY294002 and buparlisib on cell viability,  
37 migration, and suppression of PI3K signaling. These findings not only uncover additional tumor  
38 suppressor mechanisms of TR $\beta$  but shed light into the implication of TR $\beta$  status and activation  
39 on inhibitor efficacy in ATC tumors.

40

41 **Abbreviations:**

42 Akt, protein kinase B; ATC, anaplastic thyroid cancer; AXL, tyrosine-protein kinase receptor  
43 UFO; EGFR, epidermal growth factor receptor; ELISA, enzyme-linked immunosorbent assay;  
44 FGFR3/4/L1, fibroblast growth factor receptor 3/4/like 1; FTC, follicular thyroid cancer; GSK3 $\beta$ ,

45 glycogen synthase kinase 3 beta; GYS1, glycogen synthase 1; HER2, receptor tyrosine-protein  
46 kinase erbB-2; HER3, receptor tyrosine-protein kinase erbB-3; INPP4B, inositol polyphosphate  
47 4-phosphatase type II; INPP5J, phosphatidylinositol 4,5-bisphosphate 5-phosphatase A; JAK1,  
48 janus kinase 1; mTORC1/2, mammalian target of rapamycin complex 1/2; p70S6K, ribosomal  
49 protein S6 kinase beta-1 PDK1, 3-phosphoinositide dependent protein kinase 1; PDTC, poorly  
50 differentiated thyroid cancer; PEKHA2, tandem-PH-domain-containing protein-2; PHLPP1, PH  
51 domain and leucine-rich repeat-protein phosphatase 1; PI(3,4)P<sub>2</sub>, phosphatidylinositol 3,4-  
52 bisphosphate; PI(3)P, phosphatidylinositol 3-phosphate; PI(4,5)P<sub>2</sub>, phosphatidylinositol 4,5-  
53 bisphosphate; PI3K, phosphoinositide 3 kinase; PIP<sub>3</sub>, phosphatidylinositol 3,4,5 trisphosphate;  
54 PPP2R5B, protein phosphatase 2R5B; PTC, papillary thyroid cancer; PTEN, phosphatase and  
55 tensin homolog; PTPN13, protein-tyrosine-phosphatase-like protein-1; ROR1, neurotrophic  
56 tyrosine kinase receptor-related 1; RT-qPCR, reverse transcriptase quantitative polymerase  
57 chain reaction; RTK, receptor tyrosine kinase; RUNX2, runt-related transcription factor 2;  
58 STAT1, signal transducer and activator of transcription 1; T<sub>3</sub>, triiodothyronine; TR $\beta$ , thyroid  
59 hormone receptor beta

60

## 61 **1. Introduction**

62 Thyroid cancer is the most common endocrine malignancy, and the incidence has been rapidly  
63 increasing the past few decades (1). While the overall prognosis for thyroid cancer is generally  
64 favorable, patients with the most aggressive and dedifferentiated subtype, anaplastic thyroid  
65 cancer (ATC), have a median survival of three to five months (2). The current most effective  
66 treatments for ATC patients increase survival time by only a few months as drug resistance and

67 tumor recurrence often develop (3). Therefore, there is an unmet need for more precise  
68 understanding of the molecular etiology of ATC tumorigenesis and new strategies for improving  
69 patient outcome.

70 Phosphoinositide 3 kinase (PI3K) signaling is a prominent molecular driver for aggressive and  
71 poorly differentiated thyroid cancers such as ATC (4). PI3K is recruited to the plasma membrane  
72 by phosphorylated, ligand-bound receptor tyrosine kinases (RTKs). PI3K phosphorylates the  
73 membrane lipid phosphatidylinositol 4,5-bisphosphate (PI(4,5)P<sub>2</sub>) to PIP<sub>3</sub>, which recruits 3-  
74 phosphoinositide dependent protein kinase 1 (PDK1) and the mammalian target of rapamycin  
75 complex 2 (mTORC2) to the plasma membrane to phosphorylate Akt on thr308 and ser473,  
76 respectively. Phosphatase and tensin homolog (PTEN) is a tumor suppressor that  
77 dephosphorylates PIP<sub>3</sub> back to PI(4,5)P<sub>2</sub>. Akt phosphorylates a myriad of targets that are involved  
78 in cell cycle progression and survival signaling. In addition, Akt leads to the activation of mTORC1,  
79 which phosphorylates targets such as p70S6K that ultimately lead to the activation and assembly  
80 of translation factors for protein synthesis and cell growth (5,6). Multiple genes are either  
81 mutated or amplified within the PI3K pathway in ATC. Frequent alterations include amplification  
82 of RTKs such as epidermal growth factor (EGFR), amplification or gain-of-function mutations in  
83 *PIK3CA* (PI3K), loss-of-function mutations or decreased expression of *PTEN*, and amplification of  
84 *AKT1* (7-10).

85 In addition to the canonical mechanisms of PI3K regulation, there are a multitude of other factors  
86 that regulate the pathway. These factors include members of the nuclear hormone receptor  
87 family including estrogen, androgen, and thyroid hormone receptors (11-13). Our work has  
88 demonstrated that thyroid hormone receptor beta (TR $\beta$ ) acts as a tumor suppressor in ATC



89 through repression of several pathways important for tumor growth (14,15). However, the  
90 potential for TR $\beta$  to exhibit tumor suppression in ATC by suppressing PI3K is not fully understood.  
91 Multiple groups have reported the potential for TR $\beta$  to bind to the regulatory subunit of PI3K,  
92 p85 $\alpha$ , to inhibit phosphorylation of PI(4,5)P<sub>2</sub> to PIP<sub>3</sub> (16-18). While these mechanisms help  
93 explain the potential for TR $\beta$  to inhibit PI3K in certain cancer models, there may be other  
94 mechanisms of TR $\beta$ -mediated suppression. While TR $\beta$  has been shown to inhibit PI3K via  
95 nongenomic mechanisms in breast (19) and follicular thyroid (20,21) cancer, it is unknown if this  
96 mechanism or unexplored genomic mechanisms occur in ATC. Therefore, we sought to better  
97 understand the mechanism of TR $\beta$ -mediated suppression of PI3K signaling in ATC using a TR $\beta$ -  
98 expression model. Moreover, we tested the efficacy of the PI3K inhibitors LY294002 and  
99 buparlisib in cells with or without TR $\beta$  expression. These findings present previously unexplored  
100 mechanisms of the tumor suppression by TR $\beta$ , the role of TR $\beta$  in ATC, as well as the implication  
101 of TR $\beta$  expression status in response to PI3K-targeted therapeutic intervention.

102

## 103 **2. Materials and methods:**

### 104 *2.1. Culture of thyroid cell lines*

105 Cells were cultured in RPMI 1640 growth media with L-glutamine (300 mg/L), sodium pyruvate  
106 and nonessential amino acids (1%) (Corning Inc, Corning, NY, USA), supplemented with 10% fetal  
107 bovine serum (Thermo Fisher Scientific, Waltham, MA, USA) and penicillin-streptomycin (200  
108 IU/L) (Corning) at 37°C, 5% CO<sub>2</sub>, and 100% humidity. Lentivirally modified SW1736 cells were  
109 generated as described (15,22) with either an empty vector (SW-EV) or to overexpress TR $\beta$  (SW-  
110 TR $\beta$ ). SW-EV and SW-TR $\beta$  were grown in the above conditions with the addition of 2  $\mu$ g/ml

111 puromycin (Gold Bio, St Louis, MO, USA). SW1736 and KTC-2 were authenticated by the Vermont  
112 Integrative Genomics Resource at the University of Vermont (Burlington, Vermont) using short  
113 tandem repeat profiles and Promega GenePrint10 System (SW1736, May 2019; KTC-2, October  
114 2019). 8505C, OCUT-2, and CUTC60 were authenticated by University of Colorado by short  
115 tandem repeat profiles (8505C, June 2013; OCUT-2, June 2018; CUTC60, November 2018).

116

### 117 *2.2. Cell culture reagents*

118 Triiodothyronine ( $T_3$ ) was purchased from Sigma (St. Louis, MO, USA) and dissolved in 1 N NaOH  
119 and diluted to 10 nM in cell culture medium at the time of each application. LY294002 and  
120 buparlisib were purchased from MedChemExpress (Monmouth Junction, NJ, USA). LY294002 was  
121 dissolved in 100% ethanol and buparlisib was dissolved in 100% DMSO prior to indicated dilutions  
122 for cell culture experiments.

123

### 124 *2.3. Immunoblot analysis*

125 Proteins were isolated from whole cells in lysis buffer (20mM Tris-HCl (pH 8), 137mM NaCl, 10%  
126 glycerol, 1% Triton X-100, and 2mM EDTA) containing Protease Inhibitor Cocktail (Catalogue  
127 Number 78410) (Thermo Fisher Scientific), 1 mM  $Na_3VO_4$ , and 1 mM PMSF (Sigma). Proteins were  
128 quantified via Pierce Coomassie Plus (Bradford) Assay (Thermo Fisher Scientific), and 25  $\mu$ g of  
129 protein per sample were resolved by polyacrylamide gel electrophoresis on 10% Tris-Glycine gels  
130 (Catalogue Number XP00105BOX) (Thermo Fisher Scientific) and immobilized onto nitrocellulose  
131 membranes (GE Healthcare, Chicago, IL, USA) by electroblot (Bio-Rad Laboratories, Hercules, CA,  
132 USA). Membranes were blocked with 5% w/v BSA in TBS and 0.1% v/v Tween20 (Gold Bio, St

133 Louis, MO, USA) for one hour at room temperature and incubated with primary antibodies  
134 overnight (Supplementary Table 1); immunoreactive proteins were detected by enhanced  
135 chemiluminescence (Thermo Scientific) on a ChemiDoc XRS+ (Bio-Rad Laboratories).  
136 Densitometry analysis in Figure 4B was performed using ImageJ (NIH, Bethesda, MD, USA).

137

#### 138 *2.4. Measurement of Akt phosphorylation by ELISA*

139 Akt serine 473 phosphorylation was measured using Pathscan phospho-Akt1 sandwich ELISA kit,  
140 according to the manufacturer's instructions (Cell Signaling Technology, Danvers, MA, USA).  
141 Samples were prepared from cells treated with 10 nM T<sub>3</sub> for 24 hours and then 1 hour incubation  
142 in the presence or absence of 1 or 10 μM LY294002. 100 μl of samples containing equal amount  
143 of protein were applied to each well.

144

#### 145 *2.5. Measurement of PI3K activity by ELISA*

146 PI3K activity was determined using a commercially available PI3K ELISA kit (Echelon Biosciences  
147 Inc., Salt Lake City, UT) according to the manufacturer's instructions. Briefly, after drug treatment,  
148 cells were washed in ice-cold PBS and lysed in 500 μl ice-cold lysis buffer (137 mM NaCl, 20 mM  
149 Tris-HCl (pH 7.4), 1 mM CaCl<sub>2</sub>, 1 mM MgCl<sub>2</sub>, 1 mM Na<sub>3</sub>VO<sub>4</sub>, 1% NP-40 and 1 mM PMSF). PI3K was  
150 then immunoprecipitated with 5 μl of antibody (anti-p85α, MilliporeSigma, Burlington, MA, USA)  
151 and 60 μl of Pierce Protein A/G magnetic beads (Thermo Scientific). PI3K activity in  
152 the immunoprecipitates was then assayed by PI3K ELISA according to the manufacturer's  
153 instructions. The spectrophotometric data were obtained using a Synergy 2 Multi-Detection  
154 Microplate Reader (Agilent Technologies, Santa Clara, CA, USA) at a wavelength of 450 nm. The

155 protein concentrations of cellular lysates were determined by Bradford assay as described above.

156 The activity of PI3K was corrected for protein content.

157

### 158 *2.6. RNA-seq data analysis of PI3K pathway intermediates*

159 Previously published RNA-seq data was used to determine expression levels of genes within the

160 PI3K pathway (15). Construction of the PI3K signaling genes of interest for our study was based

161 on the curated IPA pathway gene set. Additional genes of interest were added based on literature

162 search and cancer relevance. Normalized transcript counts generated with DESeq2 were used to

163 calculate fold change compared to the control condition (SW-EV -T<sub>3</sub>). Raw and processed

164 expression data can be found in the Gene Expression Omnibus (GEO) database under accession

165 number GSE150364.

166

### 167 *2.7. Analysis of thyroid cancer patient sample data*

168 Publicly available microarray expression data, deposited in the GEO Database (GSE76039,

169 GSE3467, GSE82208), were analyzed using GEOR2 ([www.ncbi.nlm.nih.gov/gds](http://www.ncbi.nlm.nih.gov/gds)) to reveal

170 differential expression of genes relevant to PI3K signaling across the spectrum of thyroid cancers.

171

### 172 *2.8. RNA extraction and quantitative Real-Time PCR (qRT-PCR)*

173 Total RNA was extracted using RNeasy Plus Kit (Qiagen) according to manufacturer's protocol.

174 cDNA was then generated using the 5X RT Mastermix (ABM, Vancouver, Canada). Gene

175 expression to validate RNA-seq analysis was quantified by qRT-PCR using BrightGreen 2X qPCR

176 MasterMix (ABM, Vancouver, Canada) on a QuantStudio 3 real-time PCR system (Thermo Fisher

177 Scientific). Fold change in gene expression compared to endogenous controls was calculated  
178 using the ddCT method. Primer sequences are indicated in Supplemental Table 2.

179

### 180 *2.9. In vitro cell viability assay*

181 The cell viability assay was performed by plating  $1.0 \times 10^4$  SW-EV or SW-TR $\beta$  cells into 12 well  
182 (22.1 mm) tissue culture dishes. After adhering overnight, the cells were treated with 10 nM T<sub>3</sub>  
183 and LY294002, buparlisib, or vehicle at the indicated concentrations. Every day after treatment  
184 for four days, the medium was removed, cells were washed with PBS and lifted with trypsin  
185 (Thermo Scientific), and the number of surviving cells was counted with a hemocytometer.

186

### 187 *2.10. Migration assay*

188 Cell migration was determined by wound healing assay. Cells were plated and allowed to grow  
189 to 100% confluency. Two hours prior to scratching, cells were treated with 10  $\mu$ g/ml Mitomycin  
190 C (Sigma, MO, USA) dissolved in H<sub>2</sub>O. A scratch was performed with a P1000 pipette tip and debris  
191 was washed away with PBS. Migration media was supplemented with 10 nM T<sub>3</sub> and LY294002 or  
192 vehicle. Images were obtained using a Canon digital camera connected to an Axiovert inverted  
193 microscope (Carl Zeiss, Oberkochen, Germany) at 0, 24, 48, and 72 hours. Wound closure was  
194 measured using ImageJ macro "Wound Healing Tool" ([http://dev.mri.cnrs.fr/projects/imagej-](http://dev.mri.cnrs.fr/projects/imagej-macros/wiki/Wound_Healing_Tool)  
195 [macros/wiki/Wound\\_Healing\\_Tool](http://dev.mri.cnrs.fr/projects/imagej-macros/wiki/Wound_Healing_Tool)). Values were normalized so that the initial scratch was 0%  
196 closure.

197

### 198 *2.11. Statistics*

199 All statistical analyses were performed using GraphPad Prism software. Paired comparisons were  
200 conducted by Student's t-test. Group comparisons were made by one-way ANOVA followed by  
201 Dunnett's or Tukey's multiple comparison test as appropriate. Two-way ANOVA followed by a  
202 Tukey's multiple comparison test was conducted for multigroup analysis. Data are represented as  
203 mean  $\pm$  standard deviation. Area under the curve (AUC) at the 95th confidence interval was used  
204 to evaluate statistical differences in growth and migration assays.

205

### 206 **3. Results**

#### 207 *3.1 Rapid thyroid hormone receptor action fails to suppress PI3K in ATC cells*

208 TR $\beta$  is a known suppressor of the PI3K signaling pathway in breast and follicular thyroid cancer.  
209 This has been previously described as a nongenomic mechanism in which TR $\beta$  binds to the  
210 regulatory subunit of PI3K, p85 $\alpha$ , preventing recruitment to ligand-bound RTKs (13). This action  
211 is rapid, and the addition of the thyroid hormone triiodothyronine (T<sub>3</sub>) modulates the response  
212 within 15-30 minutes (23). Therefore, we sought to evaluate the impact of short term T<sub>3</sub>  
213 treatment in the SW1736 cell line with restored stable expression of TR $\beta$  or an empty vector (EV)  
214 control. Analysis of pAkt and pmTOR by Western blot surprisingly revealed a minimal impact of  
215 TR $\beta$  with or without T<sub>3</sub> on PI3K suppression (Fig. 1A). To validate these results, we performed a  
216 PI3K immunoprecipitation followed by ELISA to test the ability of PI3K to catalyze the  
217 phosphorylation of PI(4,5)P<sub>2</sub> to PIP<sub>3</sub> following T<sub>3</sub> treatment. Again, we observed a modest but  
218 insignificant decrease in PIP<sub>3</sub> production in the presence of TR $\beta$  and T<sub>3</sub> (Fig. 1B).

219

#### 220 *3.2 Long-term T<sub>3</sub> treatment suppresses PI3K signaling in ATC cells*

221 Since short-term  $T_3$  treatment did not suppress PI3K activity in our cell line model, we  
222 hypothesized that long-term  $T_3$  treatment may enable TR $\beta$ -mediated suppression of PI3K  
223 signaling. Therefore, we treated our EV and TR $\beta$  cells with  $T_3$  for 24 hours then measured pAkt,  
224 pmTOR, and pp70S6K levels by Western blot (Fig. 2A). The SW-TR $\beta$  cells treated with  $T_3$  exhibited  
225 a marked decrease in pAkt on serine 473 but not threonine 308. Serine 473 phosphorylation  
226 induces a substantial increase in Akt activity following growth factor stimulation and plays a role  
227 in regulating substrate specificity (24). Additionally, there was a modest reduction in pP70S6K, a  
228 kinase further downstream of Akt. To validate the observed Akt ser473 dephosphorylation, we  
229 conducted a sandwich ELISA with our EV and TR $\beta$  cells following 24-hour  $T_3$  treatment (Fig. 2B);  
230 pAkt (ser473) was again reduced with liganded-TR $\beta$ .

231 In order to test the impact of long-term  $T_3$  exposure and heightened TR $\beta$  expression we measured  
232 a well-studied downstream effector, glycogen synthase kinase 3 beta (GSK3 $\beta$ ) and its substrate  
233 glycogen synthase 1 (GYS1). GSK3 $\beta$  is a multi-substrate kinase and, importantly, is implicated in  
234 the progression of numerous cancers including ATC (25,26). We observed a modest increase in  
235 phosphorylated, and thus inactivated, GYS1 in the presence of  $T_3$  and a marked increase of pGYS1  
236 in the presence of both TR $\beta$  and  $T_3$  (Fig. 2C). Since TR $\beta$ - $T_3$  treatment suppressed both Akt-mTOR-  
237 P70S6K and Akt-GSK3 $\beta$ -GYS1 pathways, these data are suggestive of a requirement for both  
238 thyroid hormone and TR $\beta$  to achieve robust inactivation of PI3K signaling as observed through  
239 two separate pathways downstream of Akt.

240

241 *3.3 Liganded-TR $\beta$  transcriptionally remodels the PI3K signaling landscape*

242 Since a long-term T<sub>3</sub> treatment was needed for robust suppression of PI3K signaling in our cell  
243 line model, we hypothesized that TRβ may be regulating the expression of key components of  
244 this pathway. In order to better understand the extent to which TRβ suppresses PI3K signaling  
245 through genomic mechanisms, we leveraged our RNA-sequencing data performed on our EV and  
246 TRβ cell lines following 24 hours of T<sub>3</sub> treatment (15). Numerous genes involved in the PI3K  
247 pathway were determined to be differentially expressed in the presence of both T<sub>3</sub> and TRβ (Fig.  
248 3A-C).

249 Receptor tyrosine kinase gene expression was reduced in the TRβ-T<sub>3</sub> group, including HER3  
250 (*ERBB3*), fibroblast growth factor receptor isoforms (*FGFR3*, *FGFR4*, *FGFRL1*), neurotrophic  
251 tyrosine kinase receptor-related 1 (*ROR1*), and tyrosine-protein kinase receptor UFO (*AXL*).

252 While *PTEN* expression was not increased, other membrane-bound phosphoinositide  
253 phosphatases did increase including phosphatidylinositol 4,5-bisphosphate 5-phosphatase A  
254 (*INPP5J*), and inositol polyphosphate 4-phosphatase type II (*INPP4B*), which dephosphorylate  
255 PIP<sub>3</sub> to PI(3,4)P<sub>2</sub> and PI(3,4)P<sub>2</sub> to PI(3)P, respectively (27). There was also an increase in expression  
256 of cytosolic phosphatases that dephosphorylate Akt primarily on ser473, including tandem-PH-  
257 domain-containing protein-2 and protein-tyrosine-phosphatase-like protein-1 (*PLEKHA2* and  
258 *PTPN13*), the R5B localization subunit of protein phosphatase 2 (*PPP2R5B*), and PH domain and  
259 leucine-rich repeat-protein phosphatase 1 (*PHLPP1*) (28-30). In addition to these genes that serve  
260 to regulate PI3K activation and subsequent Akt phosphorylation, genes involved in PI3K  
261 recruitment and stabilization, mTORC regulation, and translation factors were found to be  
262 differentially regulated in the TRβ-T<sub>3</sub> group (Supplemental Fig. 1A-D and Table 3). The fold change



263 of a subset of the differentially expressed genes were validated via RT-qPCR (Supplemental Fig.  
264 2).

265

266 *3.4 Endogenous TR $\beta$  expression in ATC cells correlates with low pAkt ser 473 and high PI3K-Akt*  
267 *signaling phosphatase expression*

268 Following our RNA-sequencing findings in transduced SW1736 cells, we next questioned if level  
269 of endogenous TR $\beta$  expression correlates with reduced Akt phosphorylation and increased PI3K-  
270 Akt phosphatase expression. We demonstrated a significant inverse correlation between TR $\beta$   
271 expression and Akt phosphorylation as shown by immunoblot (Fig. 4A and B). Furthermore,  
272 8505C with the highest level of endogenous TR $\beta$  also had the highest expression of the  
273 phosphoinositide phosphatases *INPP4B* and *INPP5J* as well as the pAkt ser473 phosphatase  
274 *PHLLP1* (Fig. 4C). These findings illustrate the trend between TR $\beta$  and expression of tumor  
275 suppressive genes in PI3K signaling in a genetically diverse set of ATC cell lines (Supplemental  
276 Table 4).

277

278 *3.5 PI3K signaling genes regulated by TR $\beta$  in SW1736 cells are aberrantly expressed in patient*  
279 *thyroid cancer samples*

280 Next, we used expression data from matched normal tissue and papillary, follicular, poorly  
281 differentiated, and anaplastic thyroid carcinomas to determine if any of the PI3K regulators we  
282 revealed to be altered by TR $\beta$ -T<sub>3</sub> treatment exhibited differential expression in different thyroid  
283 cancer subtypes (31-33). The patient microarray data revealed that the RTKs ERBB3 (HER3),  
284 ROR1, and AXL expression levels correlate with TC subtype where expression is highest in the

285 more aggressive tumors (Fig. 5A). Conversely, phosphatase expression is highest in matched  
286 normal tissue and differentiated thyroid tumors (Fig. 5B). Interestingly, expression of FGFR4 and  
287 FGFR1 were lowest in the more aggressive PDTC and ATC populations. We next analyzed gene  
288 expression data for TR $\beta$  and markers of differentiated thyroid cells to demonstrate the  
289 connection between TR $\beta$ -T<sub>3</sub> presence with increased RTK and decreased phosphatase  
290 expression. *THRB* (TR $\beta$ ) and genes encoding enzymes and transporters for thyroid hormone  
291 synthesis were coordinately lost in FTC, PDTC, and ATC patient samples (Fig. 5C). As  
292 demonstrated previously, TR $\beta$  protein is significantly reduced in FTC, PDTC, and ATC patients (14),  
293 a finding that may contribute to the gene expression data presented here.

294

### 295 *3.6 TR $\beta$ and T<sub>3</sub> inhibit cell viability and migration in serum-activated cells*

296 PI3K signaling fuels cancer progression by stimulating cell survival, proliferation, and migration.  
297 We previously demonstrated that TR $\beta$  inhibits SW1736 proliferation in charcoal-stripped media,  
298 an observation that was dependent upon T<sub>3</sub> stimulation (15). To achieve phenotypic confirmation  
299 of our sequencing results, we challenged our engineered cells in full serum (10%) media with or  
300 without additional 10 nM T<sub>3</sub> to measure a functional consequence of PI3K inhibition. Even in the  
301 presence of full serum and activated RTKs, the TR $\beta$  group rendered the SW1736 cells less viable  
302 (Fig. 6A and B). In accordance with the RNA-sequencing data, T<sub>3</sub> is necessary for maximum  
303 inhibition of cell viability by TR $\beta$ . Additionally, we challenged our cells to migrate in the presence  
304 of liganded-TR $\beta$ . TR $\beta$  cells were unable to effectively migrate to close the wound compared to  
305 the EV cells (Fig. 6C-E). These findings are similar to what we observed previously in experiments

306 using charcoal-stripped, growth-deprived media, thus indicating the absolute requirement of TR $\beta$   
307 to inhibit cell viability and migration.

308

### 309 *3.7 TR $\beta$ improves PI3K inhibitor efficacy*

310 In order to further test our hypothesis that TR $\beta$  suppresses PI3K signaling in ATC cells, we  
311 established the efficacy of small molecule competitive PI3K inhibitors on cell cytotoxicity. Both  
312 LY294002 and buparlisib compete for the ATP-binding site of PI3K, preventing PIP<sub>2</sub>  
313 phosphorylation. It should be noted that buparlisib is 27 times more potent than LY294002 (IC<sub>50</sub>  
314 of 52 nM and 1.4  $\mu$ M, respectively (34)). The TR $\beta$  cells showed an improved response to  
315 LY294002, with an EC<sub>50</sub> value nearly 5-fold less than the EV cells (Fig. 7A). In addition, the TR $\beta$   
316 cells were nearly 25-fold more sensitive to the PI3K inhibitor buparlisib than the EV cells  
317 (Supplemental Fig. 3). In concordance with the RNA sequencing and cell viability data, TR $\beta$   
318 requires T<sub>3</sub> to fully exert the tumor suppressive profile; LY294002 efficacy was not increased in  
319 SW-TR $\beta$  cells lacking 10 nM T<sub>3</sub> (Supplemental Fig. 4). LY294002 efficacy was also enhanced in the  
320 TR $\beta$  cells as measured by migration assay at both 1 and 10  $\mu$ M (Fig. 7B-D).

321

### 322 *3.8 TR $\beta$ enhances PI3K inhibitor inactivation of the PI3K-Akt-mTOR axis*

323 To further confirm that TR $\beta$  is specifically inhibiting the PI3K signaling pathway, we challenged  
324 our cells with LY294002 and buparlisib and measured pAkt, pmTOR, and pp70S6K levels following  
325 24 hours of T<sub>3</sub> treatment. LY294002 and buparlisib were able to blunt Akt thr308 phosphorylation  
326 in both cell lines, but there was a marked decrease in levels of pAkt (ser473), pmTOR (ser2448  
327 and ser2481), and pp70S6K (Fig. 8A and Supplemental Fig. 5A). We validated these findings with

328 a pAkt (ser473) sandwich ELISA and detected lower levels of pAkt in the LY294002-treated TR $\beta$   
329 cells compared to the EV control (Figure 8B).

330 In addition to the Akt-mTOR-p70S6K axis, we also observed an increase in pGYS1 following both  
331 T<sub>3</sub> and LY294002 or buparlisib treatment in our cells, suggesting a robust Akt suppression due to  
332 TR $\beta$  activation in SW1736 cells (Fig. 8C and Supplemental Fig. 5B). Finally, these results appeared  
333 to be dependent on long-term T<sub>3</sub> treatment, as short-term T<sub>3</sub> exposure failed to significantly  
334 enhance suppression of PI3K with TR $\beta$  or LY294002 (Fig. 9A and B).

335

#### 336 4. Discussion

337 TR $\beta$  has shown to be a potent tumor suppressor in several types of cancer including breast and  
338 thyroid cancer (15,16,35,36). However, there are only a few tumor suppressive mechanisms  
339 delineated in the literature, which include TR $\beta$ -mediated JAK1/STAT1 activation and binding to  
340 p85 $\alpha$  (15,20,35). Multiple groups have shown the potential for TR $\beta$  to bind p85 $\alpha$  in the cytoplasm,  
341 inhibiting PI3K-mediated PIP<sub>2</sub> to PIP<sub>3</sub> catalysis. While TR $\beta$  and T<sub>3</sub> failed to rapidly inhibit PI3K  
342 activity in these ATC cells, transcriptomic data revealed novel genomic mechanisms of TR $\beta$ -  
343 mediated PI3K suppression. Intriguingly, negatively regulated genes included RTKs such as FGFR  
344 isoforms and HER3, both of which are implicated in advanced thyroid carcinomas (37-39). TR $\beta$ -  
345 mediated downregulation of HER3 is particularly interesting, as HER3 is the most potent  
346 activating binding partner of HER2 and was found to promote PI3K inhibitor resistance (40,41).  
347 In addition to regulating expression of upstream regulators of PI3K, TR $\beta$  increased expression of  
348 membrane-associated phosphatases, including *INPP5J* and *INPP4B*. *INPP4B* has shown to exhibit  
349 remarkable tumor suppression in an *in vivo* model of thyroid cancer by regulating PI3K signaling

350 (42). Furthermore, TR $\beta$  also increased expression of the phosphatases *PTPL1*, *PHLPP1*, and the  
351 R5B subunit of PPP2. These phosphatases preferentially dephosphorylate ser473 on Akt, and  
352 INPP4B and INPP5J modulate ser473 phosphorylation levels (28-30). Increased expression of  
353 these phosphatases would account for the robust decrease in ser473 phosphorylation but not  
354 thr308 and further supports the notion that TR $\beta$ -mediated suppression of the PI3K pathway in  
355 these cells is primarily driven by transcriptional regulation. Importantly, both Akt residues must  
356 be phosphorylated for maximum activity, as thr308 phosphorylation accounts for only 10% of Akt  
357 activity (43). Therefore, the robust pAkt ser473 dephosphorylation may be sufficient to inhibit  
358 Akt activity, accounting for the growth and migration inhibition observed in this study.  
359 Downstream consequences of TR $\beta$ -mediated dephosphorylation of Akt was observed in three  
360 well-established downstream targets of Akt, including GYS1, mTOR, and p70S6K.  
361 In addition to the previously documented mechanisms of TR $\beta$  tumor suppression, genomic  
362 regulation of PI3K regulators likely drives a reduction in cell viability and migration. TR $\beta$  enhanced  
363 the effect of PI3K inhibitors LY294002 and buparlisib as shown by decreased cell viability,  
364 migration, and cell signaling. Importantly, in a phase II trial of ATC patients, buparlisib was able  
365 to reduce tumor burden and modestly improve patient survival (44). As we have observed an  
366 enhanced response to PI3K inhibitors in the presence of TR $\beta$  and hormone, it would be  
367 worthwhile to determine if expression levels of TR $\beta$  in patient tumors were correlated with  
368 patient outcomes.  
369 In summary, our results demonstrate that TR $\beta$  suppresses PI3K signaling in SW1736 cells by  
370 genomic regulation of RTKs and phosphatases. Although the potential for TR $\beta$  to suppress PI3K  
371 signaling by binding to the p85 $\alpha$  subunit in the cytoplasm is well known, this is the first report to

372 highlight genomic mechanisms by which TR $\beta$  suppresses the PI3K-Akt-mTOR axis. The presence  
373 and activation of TR $\beta$  in ATC cells may be a promising therapeutic target to constrain tumor  
374 progression and resistance to chemotherapeutics.

375

## 376 **Acknowledgments**

377 The SW1736 and KTC-2 cell lines were generously provided by Dr. John Copland III (Mayo Clinic),  
378 and 8505C, OCUT-2, and CUTC60 cells were generously provided by Dr. Rebecca Scheppe  
379 (University of Colorado). Human cell line authentication, NextGen sequencing, automated DNA  
380 sequencing and molecular imaging was performed in the Vermont Integrative Genomics  
381 Resource supported by the University of Vermont Cancer Center, Lake Champlain Cancer  
382 Research Organization, and the UVM Larner College of Medicine. Additional human cell line  
383 authentication was performed by the CU Cancer Center Tissue Culture Shared Resource  
384 supported by NCI P30CA046934. Lentiviral constructs were made with the assistance of Dr. Jon  
385 Ramsey, University of Vermont (UVM) Cancer Translational Research Laboratory, UVM.  
386 Biorender vector graphics software was used to generate Figure 3A. We thank Dr. Jane Lian for  
387 early conceptualization and design of this project. We thank Dr. Eyal Amiel for his generous  
388 donation of several antibodies and for support on the manuscript discussion.

## 389 **References**

- 390 1. Pereira M, Williams VL, Hallanger Johnson J, Valderrabano P. Thyroid Cancer Incidence  
391 Trends in the United States: Association with Changes in Professional Guideline  
392 Recommendations. *Thyroid : official journal of the American Thyroid Association*. 2020.
- 393 2. Glaser SM, Mandish SF, Gill BS, Balasubramani GK, Clump DA, Beriwal S. Anaplastic  
394 thyroid cancer: Prognostic factors, patterns of care, and overall survival. *Head & neck*. 2016;38  
395 Suppl 1:E2083-2090.
- 396 3. Prasongsook N, Kumar A, Chintakuntlawar AV, Foote RL, Kasperbauer J, Molina J, Garces  
397 Y, Ma D, Wittich MAN, Rubin J, Richardson R, Morris J, Hay I, Fatourechi V, McIver B, Ryder M,

- 398 Thompson G, Grant C, Richards M, Sebo TJ, Rivera M, Suman V, Jenkins SM, Smallridge RC, Bible  
399 KC. Survival in Response to Multimodal Therapy in Anaplastic Thyroid Cancer. *The Journal of*  
400 *clinical endocrinology and metabolism*. 2017;102(12):4506-4514.
- 401 4. Xing M. Molecular pathogenesis and mechanisms of thyroid cancer. *Nature reviews*  
402 *Cancer*. 2013;13(3):184-199.
- 403 5. Martini M, De Santis MC, Braccini L, Gulluni F, Hirsch E. PI3K/AKT signaling pathway and  
404 cancer: an updated review. *Annals of medicine*. 2014;46(6):372-383.
- 405 6. Jiang N, Dai Q, Su X, Fu J, Feng X, Peng J. Role of PI3K/AKT pathway in cancer: the  
406 framework of malignant behavior. *Molecular biology reports*. 2020;47(6):4587-4629.
- 407 7. Liu Z, Hou P, Ji M, Guan H, Studeman K, Jensen K, Vasko V, El-Naggar AK, Xing M. Highly  
408 prevalent genetic alterations in receptor tyrosine kinases and phosphatidylinositol 3-kinase/akt  
409 and mitogen-activated protein kinase pathways in anaplastic and follicular thyroid cancers. *The*  
410 *Journal of clinical endocrinology and metabolism*. 2008;93(8):3106-3116.
- 411 8. Santarpia L, El-Naggar AK, Cote GJ, Myers JN, Sherman SI. Phosphatidylinositol 3-  
412 kinase/akt and ras/raf-mitogen-activated protein kinase pathway mutations in anaplastic  
413 thyroid cancer. *The Journal of clinical endocrinology and metabolism*. 2008;93(1):278-284.
- 414 9. Wang Y, Hou P, Yu H, Wang W, Ji M, Zhao S, Yan S, Sun X, Liu D, Shi B, Zhu G, Condouris  
415 S, Xing M. High prevalence and mutual exclusivity of genetic alterations in the  
416 phosphatidylinositol-3-kinase/akt pathway in thyroid tumors. *The Journal of clinical*  
417 *endocrinology and metabolism*. 2007;92(6):2387-2390.
- 418 10. Dahia PL, Marsh DJ, Zheng Z, Zedenius J, Komminoth P, Frisk T, Wallin G, Parsons R,  
419 Longy M, Larsson C, Eng C. Somatic deletions and mutations in the Cowden disease gene, PTEN,  
420 in sporadic thyroid tumors. *Cancer research*. 1997;57(21):4710-4713.
- 421 11. Cheng JQ, Lindsley CW, Cheng GZ, Yang H, Nicosia SV. The Akt/PKB pathway: molecular  
422 target for cancer drug discovery. *Oncogene*. 2005;24(50):7482-7492.
- 423 12. Cao X, Kambe F, Yamauchi M, Seo H. Thyroid-hormone-dependent activation of the  
424 phosphoinositide 3-kinase/Akt cascade requires Src and enhances neuronal survival. *Biochem J*.  
425 2009;424(2):201-209.
- 426 13. Hiroi Y, Kim HH, Ying H, Furuya F, Huang Z, Simoncini T, Noma K, Ueki K, Nguyen NH,  
427 Scanlan TS, Moskowitz MA, Cheng SY, Liao JK. Rapid nongenomic actions of thyroid hormone.  
428 *Proc Natl Acad Sci U S A*. 2006;103(38):14104-14109.
- 429 14. Carr FE, Tai PW, Barnum MS, Gillis NE, Evans KG, Taber TH, White JH, Tomczak JA,  
430 Jaworski DM, Zaidi SK, Lian JB, Stein JL, Stein GS. Thyroid Hormone Receptor-beta (TRbeta)  
431 Mediates Runt-Related Transcription Factor 2 (Runx2) Expression in Thyroid Cancer Cells: A  
432 Novel Signaling Pathway in Thyroid Cancer. *Endocrinology*. 2016;157(8):3278-3292.
- 433 15. Bolf EL, Gillis NE, Davidson CD, Rodriguez PD, Cozzens L, Tomczak JA, Fietze S, Carr FE.  
434 Thyroid Hormone Receptor Beta Induces A Tumor Suppressive Program In Anaplastic Thyroid  
435 Cancer. *Molecular cancer research : MCR*. 2020.
- 436 16. Kim WG, Zhao L, Kim DW, Willingham MC, Cheng SY. Inhibition of tumorigenesis by the  
437 thyroid hormone receptor beta in xenograft models. *Thyroid : official journal of the American*  
438 *Thyroid Association*. 2014;24(2):260-269.
- 439 17. Martin NP, Marron Fernandez de Velasco E, Mizuno F, Scappini EL, Gloss B, Erxleben C,  
440 Williams JG, Stapleton HM, Gentile S, Armstrong DL. A rapid cytoplasmic mechanism for PI3  
441 kinase regulation by the nuclear thyroid hormone receptor, TRbeta, and genetic evidence for its



- 442 role in the maturation of mouse hippocampal synapses in vivo. *Endocrinology*.  
443 2014;155(9):3713-3724.
- 444 18. Martinez-Iglesias O, Garcia-Silva S, Tenbaum SP, Regadera J, Larcher F, Paramio JM,  
445 Vennstrom B, Aranda A. Thyroid hormone receptor beta1 acts as a potent suppressor of tumor  
446 invasiveness and metastasis. *Cancer research*. 2009;69(2):501-509.
- 447 19. Park JW, Zhao L, Willingham M, Cheng S-y. Oncogenic mutations of thyroid hormone  
448 receptor  $\beta$ . *Oncotarget*. 2015;6(10):8115-8131.
- 449 20. Furuya F, Hanover JA, Cheng SY. Activation of phosphatidylinositol 3-kinase signaling by  
450 a mutant thyroid hormone beta receptor. *Proc Natl Acad Sci U S A*. 2006;103(6):1780-1785.
- 451 21. Kato Y, Ying H, Willingham MC, Cheng SY. A tumor suppressor role for thyroid hormone  
452 beta receptor in a mouse model of thyroid carcinogenesis. *Endocrinology*. 2004;145(10):4430-  
453 4438.
- 454 22. Gillis NE, Taber TH, Bolf EL, Beaudet CM, Tomczak JA, White JH, Stein JL, Stein GS, Lian  
455 JB, Frietze S, Carr FE. Thyroid Hormone Receptor  $\beta$  Suppression of RUNX2 is Mediated by  
456 Brahma Related Gene 1 Dependent Chromatin Remodeling. *Endocrinology*. 2018:en.2018-  
457 00128-en.02018-00128.
- 458 23. Verga Falzacappa C, Petrucci E, Patriarca V, Michienzi S, Stigliano A, Brunetti E, Toscano  
459 V, Misiti S. Thyroid hormone receptor TRbeta1 mediates Akt activation by T3 in pancreatic beta  
460 cells. *Journal of molecular endocrinology*. 2007;38(1-2):221-233.
- 461 24. Manning BD, Cantley LC. AKT/PKB signaling: navigating downstream. *Cell*.  
462 2007;129(7):1261-1274.
- 463 25. Domoto T, Pyko IV, Furuta T, Miyashita K, Uehara M, Shimasaki T, Nakada M, Minamoto  
464 T. Glycogen synthase kinase-3 $\beta$  is a pivotal mediator of cancer invasion and resistance to  
465 therapy. *Cancer Sci*. 2016;107(10):1363-1372.
- 466 26. Orlandella FM, Mariniello RM, Iervolino PLC, Auletta L, De Stefano AE, Ugolini C, Greco  
467 A, Mirabelli P, Pane K, Franzese M, Denaro M, Basolo F, Salvatore G. Junctional adhesion  
468 molecule-A is down-regulated in anaplastic thyroid carcinomas and reduces cancer cell  
469 aggressiveness by modulating p53 and GSK3  $\alpha/\beta$  pathways. *Mol Carcinog*. 2019;58(7):1181-  
470 1193.
- 471 27. Toker A, Rameh L. PIPping on AKT1: How Many Phosphatases Does It Take to Turn off  
472 PI3K? *Cancer cell*. 2015;28(2):143-145.
- 473 28. O'Neill AK, Niederst MJ, Newton AC. Suppression of survival signalling pathways by the  
474 phosphatase PHLPP. *The FEBS journal*. 2013;280(2):572-583.
- 475 29. Kimber WA, Deak M, Prescott AR, Alessi DR. Interaction of the protein tyrosine  
476 phosphatase PTPL1 with the PtdIns(3,4)P2-binding adaptor protein TAPP1. *Biochem J*.  
477 2003;376(Pt 2):525-535.
- 478 30. Beg M, Srivastava A, Shankar K, Varshney S, Rajan S, Gupta A, Kumar D, Gaikwad AN.  
479 PPP2R5B, a regulatory subunit of PP2A, contributes to adipocyte insulin resistance. *Molecular  
480 and cellular endocrinology*. 2016;437:97-107.
- 481 31. He H, Jazdzewski K, Li W, Liyanarachchi S, Nagy R, Volinia S, Calin GA, Liu CG, Franssila K,  
482 Suster S, Kloos RT, Croce CM, de la Chapelle A. The role of microRNA genes in papillary thyroid  
483 carcinoma. *Proc Natl Acad Sci U S A*. 2005;102(52):19075-19080.
- 484 32. Landa I, Ibrahimasic T, Boucai L, Sinha R, Knauf JA, Shah RH, Dogan S, Ricarte-Filho JC,  
485 Krishnamoorthy GP, Xu B, Schultz N, Berger MF, Sander C, Taylor BS, Ghossein R, Ganly I, Fagin



- 486 JA. Genomic and transcriptomic hallmarks of poorly differentiated and anaplastic thyroid  
487 cancers. *J Clin Invest*. 2016;126(3):1052-1066.
- 488 33. Wojtas B, Pfeifer A, Oczko-Wojciechowska M, Krajewska J, Czarniecka A, Kukulska A,  
489 Eszlinger M, Musholt T, Stokowy T, Swierniak M, Stobiecka E, Chmielik E, Rusinek D, Tyszkiewicz  
490 T, Halczok M, Hauptmann S, Lange D, Jarzab M, Paschke R, Jarzab B. Gene Expression (mRNA)  
491 Markers for Differentiating between Malignant and Benign Follicular Thyroid Tumours. *Int J Mol*  
492 *Sci*. 2017;18(6).
- 493 34. Akinleye A, Avvaru P, Furqan M, Song Y, Liu D. Phosphatidylinositol 3-kinase (PI3K)  
494 inhibitors as cancer therapeutics. *J Hematol Oncol*. 2013;6(1):88.
- 495 35. Furuya F, Lu C, Willingham MC, Cheng SY. Inhibition of phosphatidylinositol 3-kinase  
496 delays tumor progression and blocks metastatic spread in a mouse model of thyroid cancer.  
497 *Carcinogenesis*. 2007;28(12):2451-2458.
- 498 36. López-Mateo I, Alonso-Merino E, Suarez-Cabrera C, Park JW, Cheng SY, Alemany S,  
499 Paramio JM, Aranda A. Thyroid Hormone Receptor  $\beta$  Inhibits Self-Renewal Capacity of Breast  
500 Cancer Stem Cells. *Thyroid : official journal of the American Thyroid Association*.  
501 2020;30(1):116-132.
- 502 37. Kasaian K, Wiseman SM, Walker BA, Schein JE, Zhao Y, Hirst M, Moore RA, Mungall AJ,  
503 Marra MA, Jones SJ. The genomic and transcriptomic landscape of anaplastic thyroid cancer:  
504 implications for therapy. *BMC cancer*. 2015;15:984.
- 505 38. Yamazaki H, Yokose T, Hayashi H, Iwasaki H, Osanai S, Suganuma N, Nakayama H,  
506 Masudo K, Rino Y, Masuda M. Expression of fibroblast growth factor receptor 4 and clinical  
507 response to lenvatinib in patients with anaplastic thyroid carcinoma: a pilot study. *Eur J Clin*  
508 *Pharmacol*. 2020;76(5):703-709.
- 509 39. Cheng L, Jin Y, Liu M, Ruan M, Chen L. HER inhibitor promotes BRAF/MEK inhibitor-  
510 induced redifferentiation in papillary thyroid cancer harboring BRAFV600E. *Oncotarget*.  
511 2017;8(12):19843-19854.
- 512 40. Chakrabarty A, Sanchez V, Kuba MG, Rinehart C, Arteaga CL. Feedback upregulation of  
513 HER3 (ErbB3) expression and activity attenuates antitumor effect of PI3K inhibitors. *Proc Natl*  
514 *Acad Sci U S A*. 2012;109(8):2718-2723.
- 515 41. Tzahar E, Waterman H, Chen X, Levkowitz G, Karunagaran D, Lavi S, Ratzkin BJ, Yarden Y.  
516 A hierarchical network of interreceptor interactions determines signal transduction by Neu  
517 differentiation factor/neuregulin and epidermal growth factor. *Mol Cell Biol*. 1996;16(10):5276-  
518 5287.
- 519 42. Li Chew C, Lunardi A, Gulluni F, Ruan DT, Chen M, Salmena L, Nishino M, Papa A, Ng C,  
520 Fung J, Clohessy JG, Sasaki J, Sasaki T, Bronson RT, Hirsch E, Pandolfi PP. In Vivo Role of INPP4B  
521 in Tumor and Metastasis Suppression through Regulation of PI3K-AKT Signaling at Endosomes.  
522 *Cancer Discov*. 2015;5(7):740-751.
- 523 43. Fayard E, Tintignac LA, Baudry A, Hemmings BA. Protein kinase B/Akt at a glance. *Journal*  
524 *of cell science*. 2005;118(Pt 24):5675-5678.
- 525 44. Borson-Chazot F, Dantony E, Illouz F, Lopez J, Niccoli P, Wassermann J, Do Cao C,  
526 Leboulleux S, Klein M, Tabarin A, Eberle MC, Benisvy D, de la Fouchardiere C, Bournaud C,  
527 Lasolle H, Delahaye A, Rabilloud M, Lapras V, Decaussin-Petrucci M, Schlumberger M. Effect of  
528 Buparlisib, a Pan-Class I PI3K Inhibitor, in Refractory Follicular and Poorly Differentiated Thyroid  
529 Cancer. *Thyroid : official journal of the American Thyroid Association*. 2018;28(9):1174-1179.

- 530 45. Manning BD, Toker A. AKT/PKB Signaling: Navigating the Network. *Cell*.  
531 2017;169(3):381-405.
- 532 46. Zinzalla V, Stracka D, Oppliger W, Hall MN. Activation of mTORC2 by association with the  
533 ribosome. *Cell*. 2011;144(5):757-768.
- 534 47. Xu JH, Zhao JX, Jiang MY, Yang LP, Sun ML, Wang HW. MiR-193 promotes cell  
535 proliferation and invasion by ING5/PI3K/AKT pathway of triple-negative breast cancer. *Eur Rev*  
536 *Med Pharmacol Sci*. 2020;24(6):3122-3129.
- 537 48. Mahajan K, Mahajan NP. ACK1/TNK2 tyrosine kinase: molecular signaling and evolving  
538 role in cancers. *Oncogene*. 2015;34(32):4162-4167.
- 539 49. Laplante M, Sabatini DM. mTOR signaling at a glance. *Journal of cell science*. 2009;122(Pt  
540 20):3589-3594.
- 541 50. Jia J, Abudu YP, Claude-Taupin A, Gu Y, Kumar S, Choi SW, Peters R, Mudd MH, Allers L,  
542 Salemi M, Phinney B, Johansen T, Deretic V. Galectins Control mTOR in Response to  
543 Endomembrane Damage. *Mol Cell*. 2018;70(1):120-135.e128.
- 544 51. Landa I, Pozdeyev N, Korch C, Marlow LA, Smallridge RC, Copland JA, Henderson YC, Lai  
545 SY, Clayman GL, Onoda N, Tan AC, Garcia-Rendueles MER, Knauf JA, Haugen BR, Fagin JA,  
546 Schweppe RE. Comprehensive Genetic Characterization of Human Thyroid Cancer Cell Lines: A  
547 Validated Panel for Preclinical Studies. *Clinical cancer research : an official journal of the*  
548 *American Association for Cancer Research*. 2019.

549

550

551

552

553

554

555

556

557

558

559

560

561

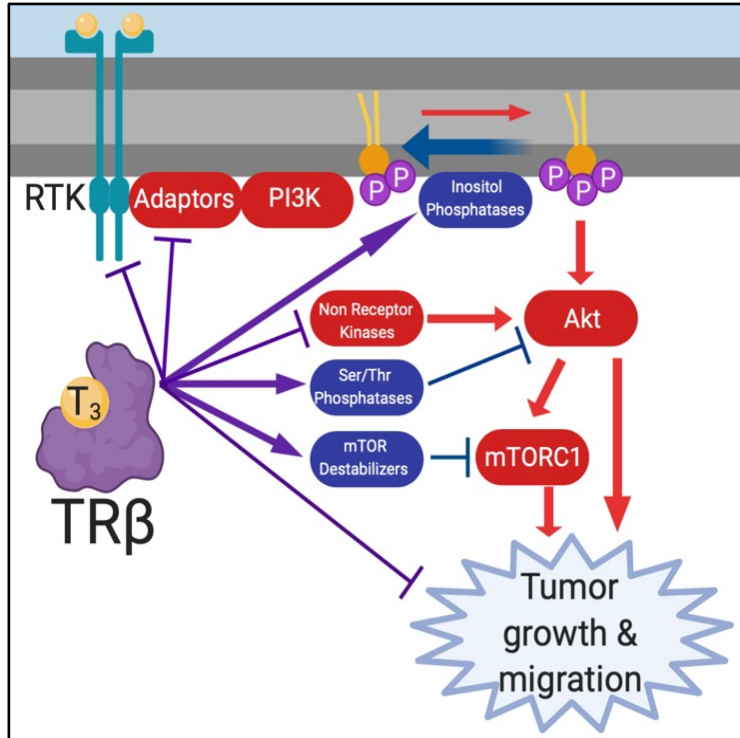

Graphical abstract

562

563

564

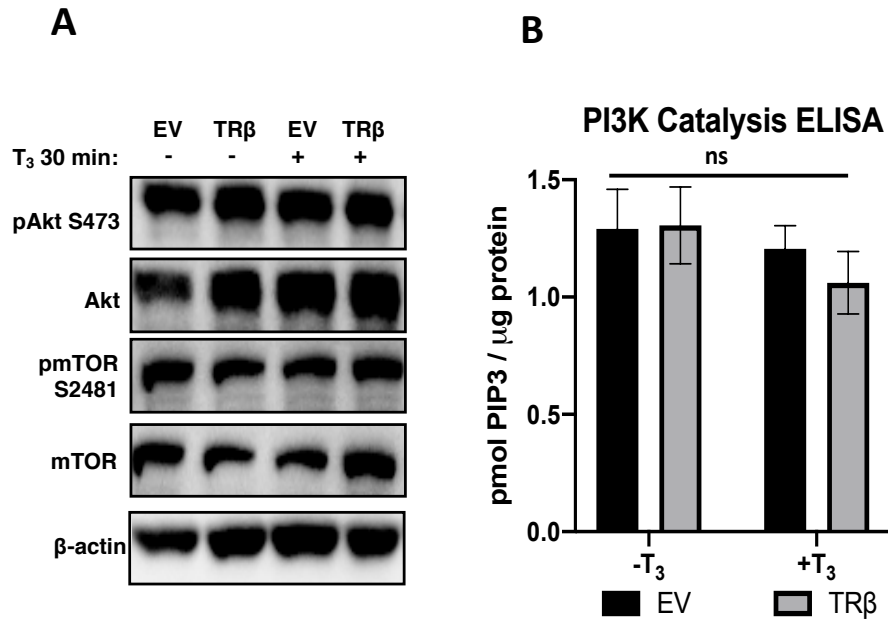

**Figure 1. Short-term or no exposure to T<sub>3</sub> is insufficient for TR $\beta$ -mediated PI3K suppression.** SW1736-EV (EV) and SW1736-TR $\beta$  (TR $\beta$ ) cells were treated with 10 nM T<sub>3</sub> or vehicle (1 N NaOH) for 30 min before protein levels were determined by immunoblot (**A**) or incubated with anti-p85 $\alpha$  antibody for PI3K catalysis ELISA (**B**). ELISA signal in **B** was standardized to protein concentration as determined by a Bradford assay. Significance in **B** was calculated by two-way ANOVA followed by Tukey multiple comparisons test. ns = no significance ( $p \geq 0.05$ ) across treatment groups.

565

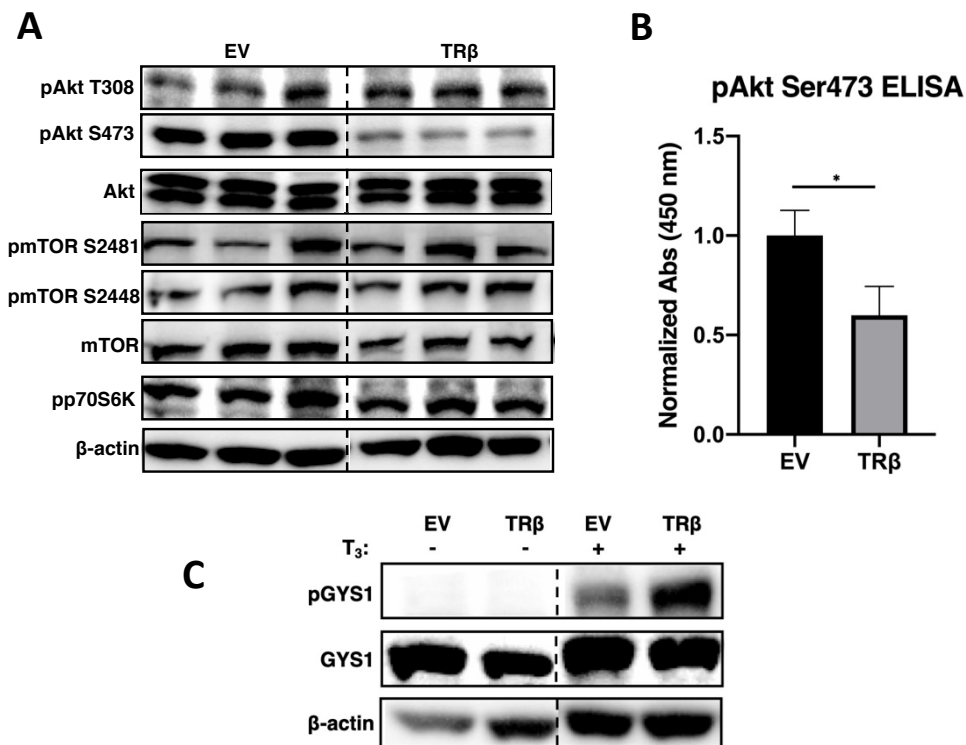

**Figure 2: Long-term T<sub>3</sub> with TRβ inhibits the PI3K-Akt-mTOR pathway in SW1736 cells.** SW1736-EV (EV) and SW1736-TRβ (TRβ) cells were treated with 10 nM T<sub>3</sub> for 24 hours before protein levels were determined by immunoblot (**A** and **C**) or subjugated to a pAkt Ser473 sandwich ELISA (**B**). The samples in **A** are replicates. Dashed lines in immunoblots indicate gap between two sets of lanes on the same membrane. ELISA signal in **B** was standardized to protein concentration as determined by a Bradford assay. Significance in **B** was calculated by Student's t-test. (\*p < 0.05).

566

567

568

569

570

571

572

573

574

A

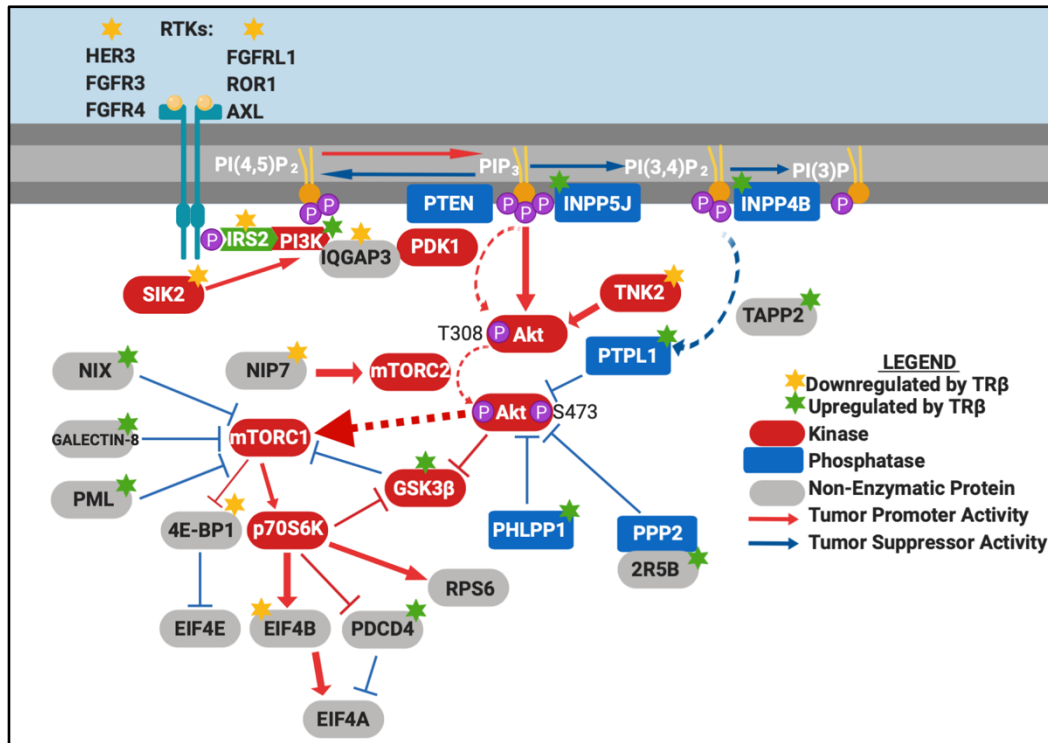

B

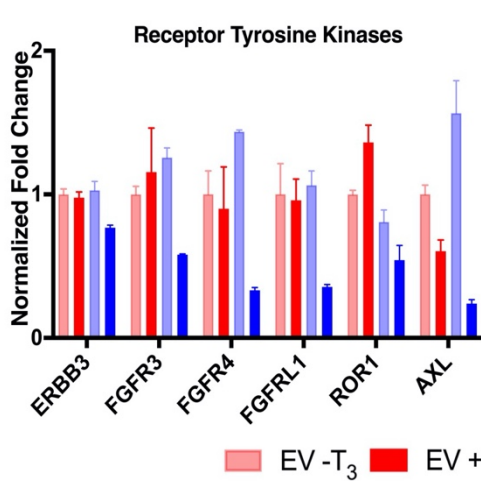

C

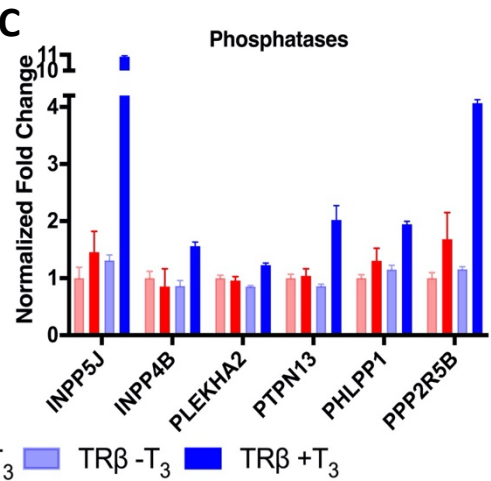

575

576 **Figure 3: Liganded-TRβ decreases expression of oncogenic genes and increases tumor**  
 577 **suppressible genes in the PI3K-Akt-mTOR signaling axis. A.** RTKs dimerize in response to ligand  
 578 to allow for IRS2 to dock and recruit PI3K (45). PI3K phosphorylates PI(4,5)P<sub>2</sub> to PIP<sub>3</sub>. PTEN and  
 579 INPP5J dephosphorylate PIP<sub>3</sub> to PI(4,5)P<sub>2</sub> and PI(3,4)P<sub>2</sub> respectively. INPP4B dephosphorylates  
 580 PI(3,4)P<sub>2</sub> to PI(3)P. PIP<sub>3</sub> recruits PDK1 (not shown) and Akt to the plasma membrane for PDK1  
 581 phosphorylation of Akt T308. NIP7-activated mTORC2 phosphorylates Akt S473, which is  
 582 dephosphorylated by PHLPP1 (46). ING5 has been shown to dephosphorylate Akt in hormone-  
 583 dependent cancers (47). The 2R5B subunit of PPP2 directs the complex to dephosphorylate Akt  
 584 T308 and S473 (30). TNK2 phosphorylates Akt Y176 to enhance plasma membrane recruitment

585 (48). Akt leads to the activation of mTORC1 by TSC 1/2-Rheb (not shown). Nix and PML destabilize  
 586 Rheb-mTORC1 binding (49). Galectin-8 inhibits and delocalizes mTORC1 (50). GSK3 $\beta$  is inhibited  
 587 by Akt and inhibits multiple substrates relevant to glucose and glycogen metabolism, survival  
 588 signaling, and cell cycle progression. mTORC1 phosphorylates and inhibits 4E-BP1 which inhibits  
 589 EIF4E. MTORC1 also activates P70S6K which inhibits GSK3 $\beta$  and PDCD4 and activates EIF4B and  
 590 RPS6. EIF4B and PDCD4 regulate EIF4A (49). **B.** Ligand-bound TR $\beta$  decreased expression of  
 591 receptor tyrosine kinases. **C.** Ligand-bound TR $\beta$  increased expression of PI3K-Akt phosphatases.  
 592 Significance and fold change values between EV+T<sub>3</sub> and TR $\beta$ +T<sub>3</sub> are located in Supplementary  
 593 Table 1.  
 594

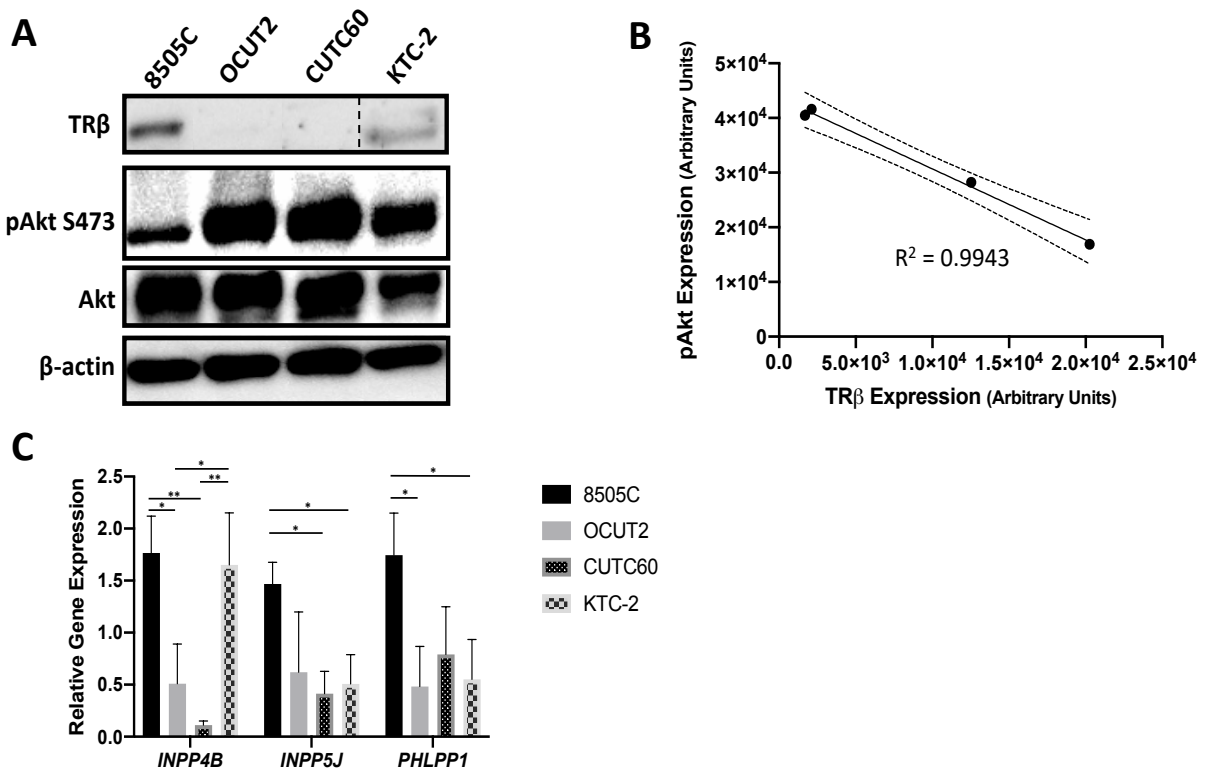

**Figure 4: TR $\beta$  expression correlates with low Akt ser473 phosphorylation and high phosphoinositide and Akt phosphatase expression.** ATC cell lines were analyzed for TR $\beta$  and pAkt ser473 expression (**A and B**) and phosphoinositide and Akt phosphatases (**C**). Dashed line in immunoblot indicates gap between two sets of lanes on the same membrane. Significance was determined by one-way ANOVA followed by Dunnett's multiple comparisons test (\*  $p < 0.05$ , \*\*  $p < 0.01$ ).

595

596

**A**

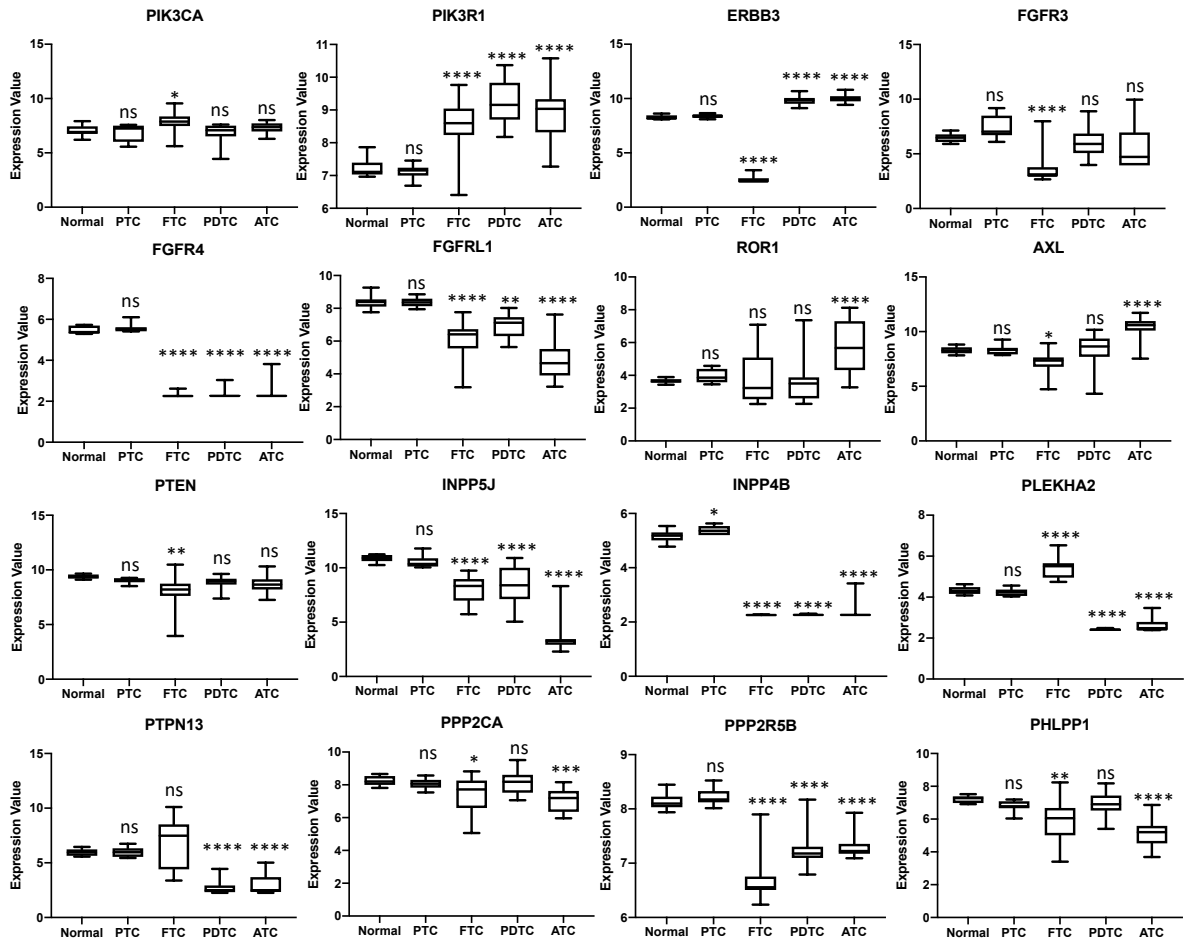

**B**

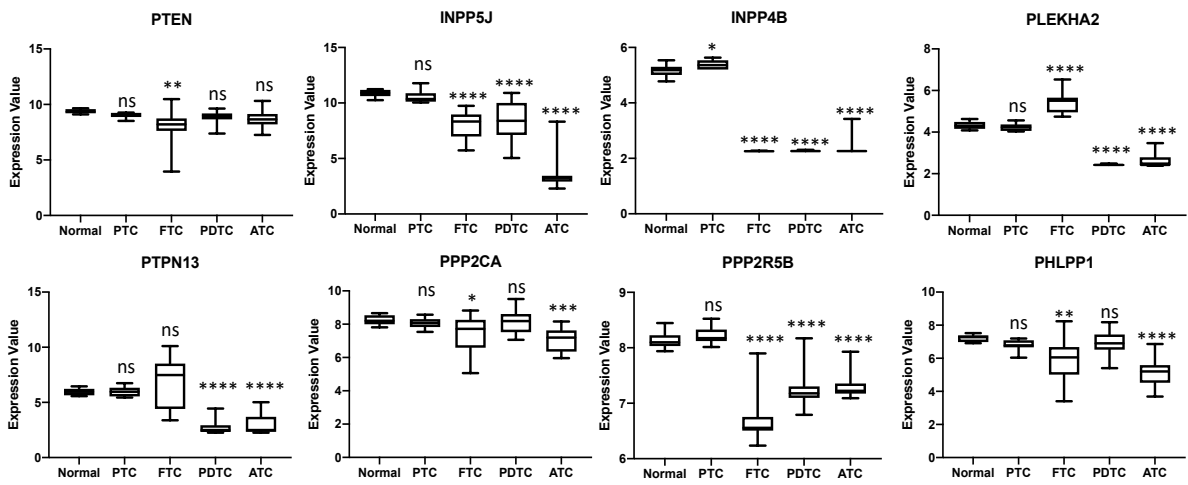



600  
 601  
 602  
 603  
 604  
 605  
 606  
 607  
 608  
 609  
 610  
 611  
 612  
 613  
 614  
 615  
 616  
 617  
 618  
 619  
 620  
 621

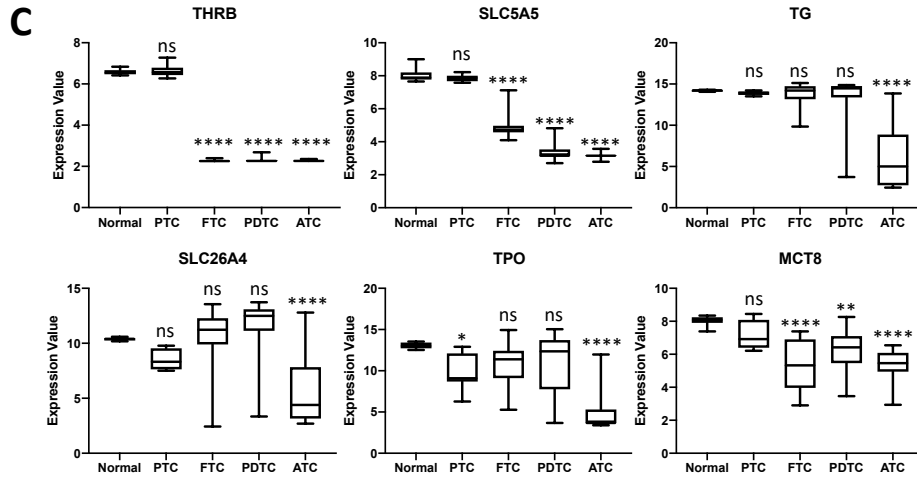

**Figure 5: PI3K signaling genes regulated by TRβ in SW1736 cells are aberrantly expressed in patient thyroid cancer samples.** Patient thyroid cancer microarray data (GSE76039, GSE3467, GSE82208) were analyzed for genes encoding receptor tyrosine kinases (A), phosphoinositide and Akt phosphatases (B), and TRβ, enzymes, and transporters necessary for synthesizing thyroid hormones. Significance was determined by one-way ANOVA followed by Dunnett's multiple comparisons test (ns = no significance  $p \geq 0.05$ , \*  $p < 0.05$ , \*\*  $p < 0.01$ , \*\*\* $p < 0.001$ , \*\*\*\*  $p < 0.0001$ ). Normal n = 9. PTC n = 9, FTC n = 27, PDTC n = 17, ATC n = 20

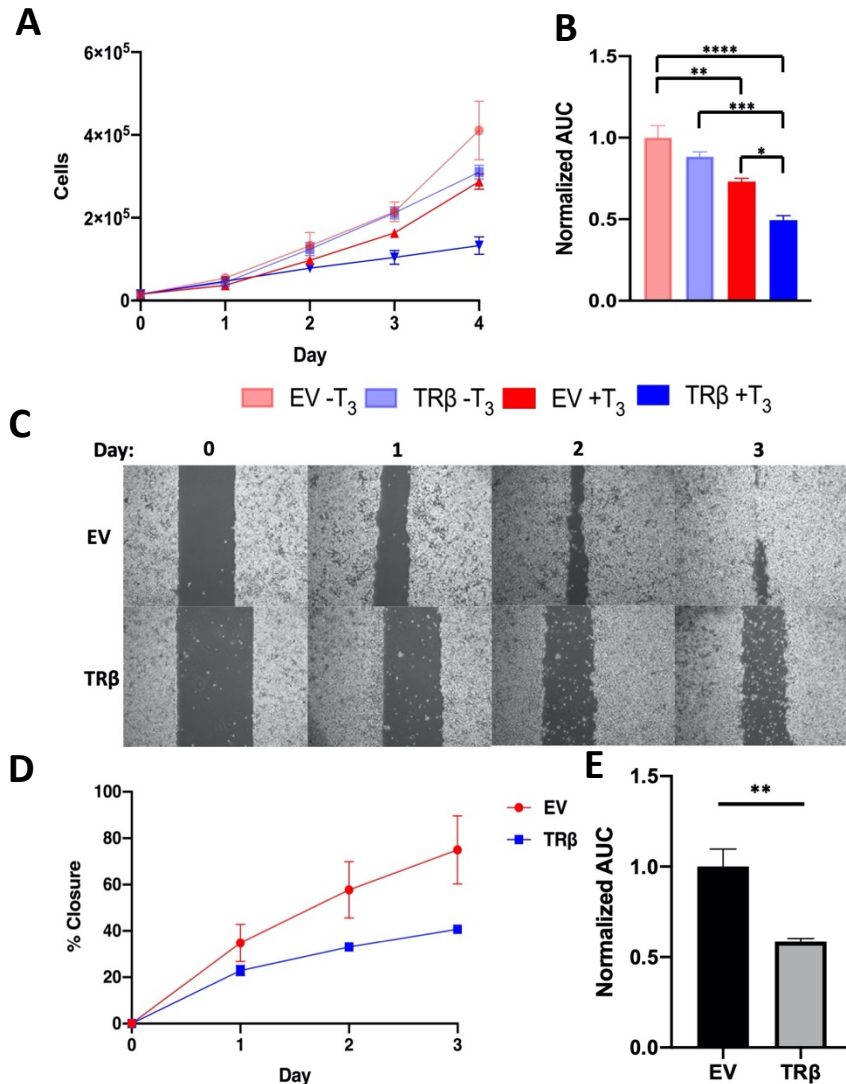

**Figure 6: TRβ and T<sub>3</sub> reduce cell viability and migration in serum-activated SW1736 cells.**

**A.** SW1736-EV (EV) and SW1736-TRβ (TRβ) cells were treated with 10 nM T<sub>3</sub> or vehicle (1 N NaOH) for four days. Each day the cells were lifted with trypsin and counted using a hemocytometer for viable cells. Area under the curve (AUC) analysis was performed (**B**) and normalized to the EV-T<sub>3</sub> group. Significance was calculated using one-way ANOVA followed by Tukey's multiple comparisons test (\* p < 0.05, \*\* p < 0.01, \*\*\*p < 0.001, \*\*\*\* p < 0.0001). **C.** EV and TRβ cells were grown to confluency in 6 well plates before treatment with 10 μg/ml mitomycin C for 2.5 hours. Media were aspirated, and the cells were scratched with a P1000 pipette tip before being washed with PBS and treated with media containing 10 nM T<sub>3</sub>. **D.** Wells were imaged each day and % wound closure relative to day 1 was calculated. **E.** Area under the curve (AUC) analysis was performed and normalized to the EV group. Significance was calculated using Student's t-test test. \*\* p < 0.01.

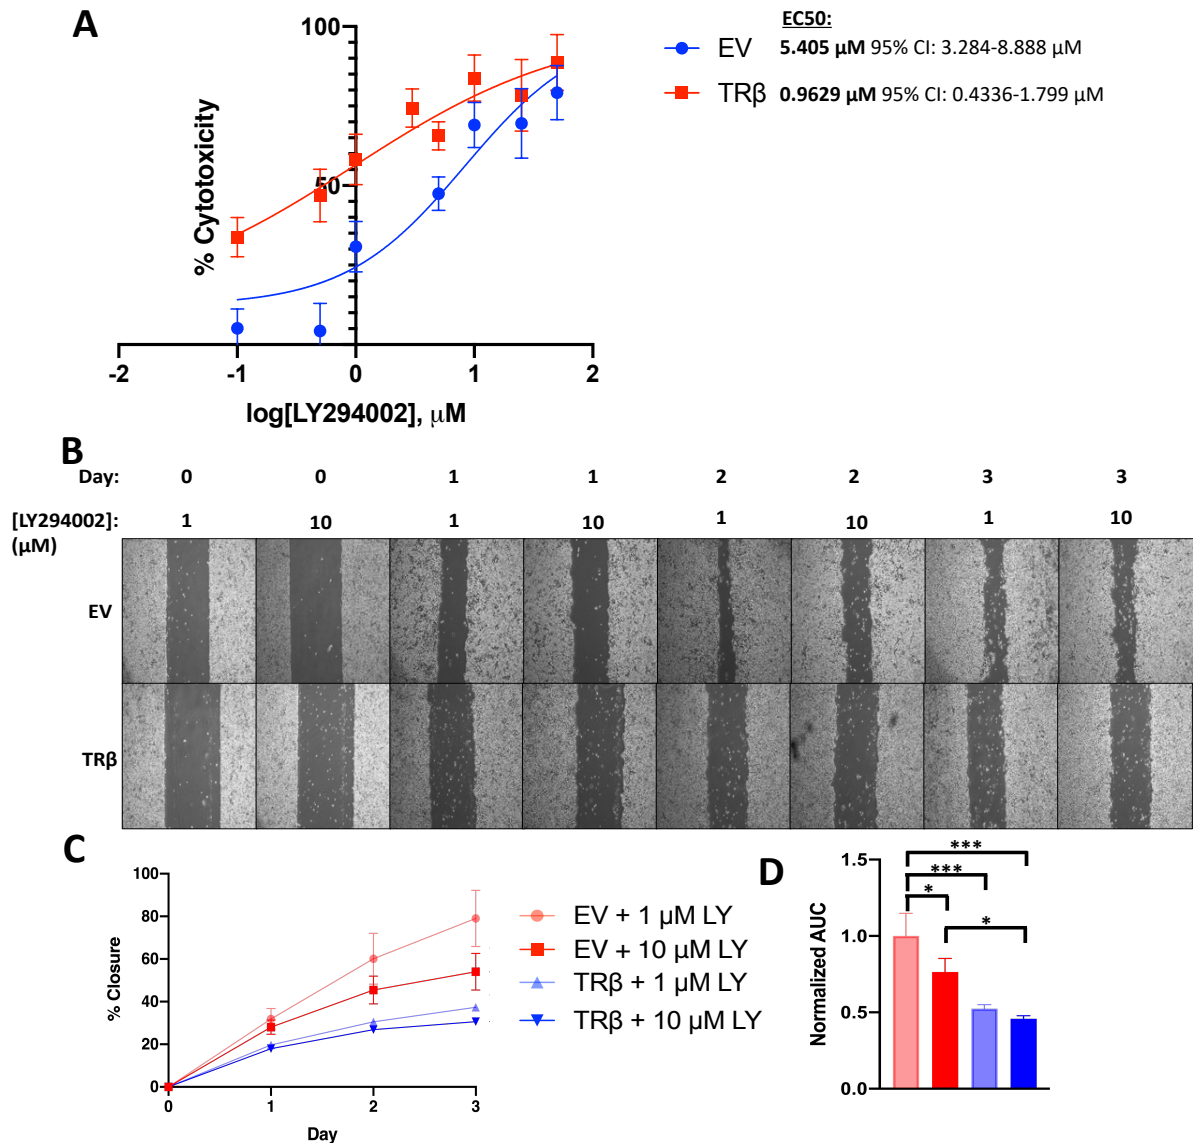

**Figure 7: The effect of LY294002 on cytotoxicity and migration is enhanced in SW1736-TR $\beta$  cells.** **A.** EV and TR $\beta$  cells were treated with 10 nM T<sub>3</sub> and LY294002 (0.1-50  $\mu\text{M}$ ) or matched-concentration vehicle (100% EtOH) for four days. Each day the cells were lifted with trypsin and counted using a hemocytometer for viable cells. Area the curve analysis was conducted for each LY294002 concentration to calculate % cytotoxicity relative to EV vehicle at each concentration of LY294002. EC50 values were calculated using GraphPad Prism's nonlinear regression package. **B.** EV and TR $\beta$  cells were grown to confluency in 6 well plates before treatment with 10  $\mu\text{g}/\text{ml}$  mitomycin C for 2.5 hours. Media were aspirated, and the cells were scratched with a P1000 pipette tip before being washed with PBS and treated with media containing 10 nM T<sub>3</sub> and 1 or 10  $\mu\text{M}$  LY294002. **C.** Wells were imaged each day and % wound closure relative to day 1 was calculated. **D.** Area under the curve (AUC) analysis was performed and normalized to the EV 1  $\mu\text{M}$  LY294002 group. Significance was calculated using one-way ANOVA followed by Tukey's multiple comparisons test (\*  $p < 0.05$ , \*\*  $p < 0.01$ , \*\*\* $p < 0.001$ ).

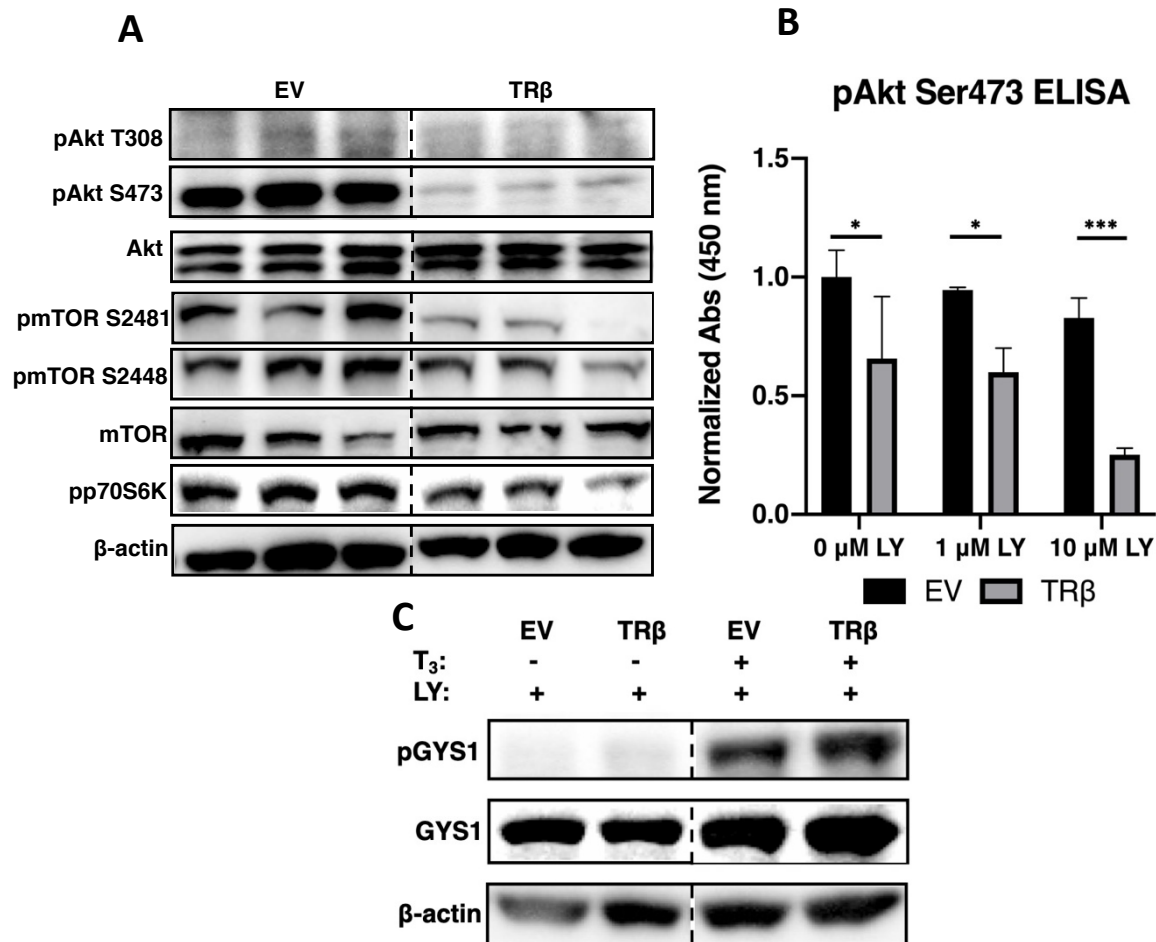

**Figure 8: TRβ enhances LY294002-mediated inactivation of the PI3K-Akt-mTOR axis.**

SW1736-EV (EV) and SW1736-TRβ (TRβ) cells were treated with 10 nM T<sub>3</sub> for 24 hours before 1 hour of LY294002 (LY) treatment (**A** and **C**: 10 μM, **B**: 0, 1, or 10 μM). Protein levels were determined by immunoblot (**A** and **C**) or subjugated to a pAkt Ser473 sandwich ELISA (**B**). Samples in **A** are replicates. Dashed lines in immunoblots indicate gap between two sets of lanes on the same membrane. ELISA signal in **B** was standardized to protein concentration as determined by a Bradford assay. Significance in **B** was calculated by one-way ANOVA followed by Sidak's multiple comparison test. (\*p < 0.05, \*\*\*p < 0.001).

624

625

626

627

628

629

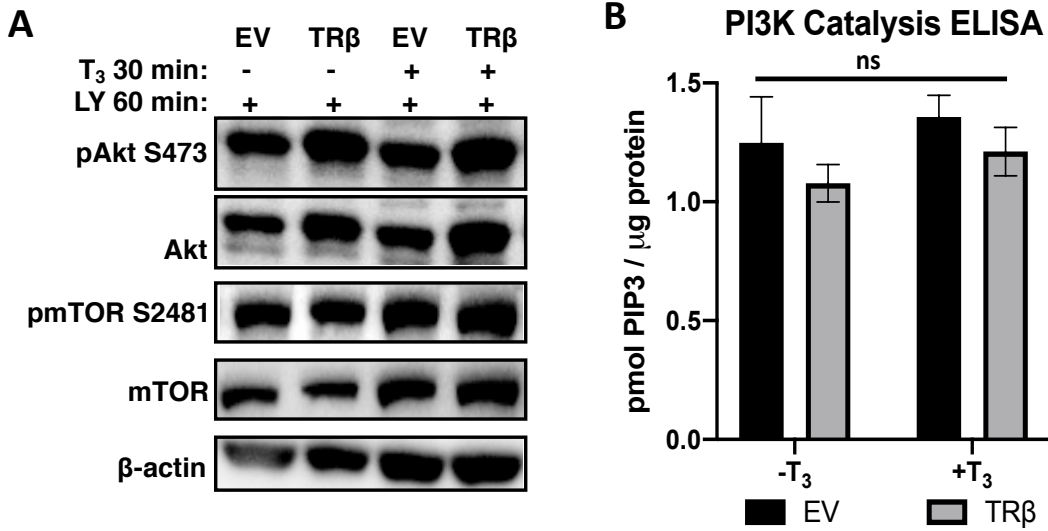

**Figure 9. Short-term or no exposure to T<sub>3</sub> is insufficient for TRβ to enhance LY294002 suppression of PI3K.**

SW1736-EV (EV) and SW1736-TRβ (TRβ) cells were treated with 10 nM T<sub>3</sub> or vehicle (1 N NaOH) for 30 min before 1 hour of 10 μM LY294002 (LY) treatment. Protein levels were determined by immunoblot (A) or incubated with anti-p85α antibody for PI3K catalysis ELISA (B). ELISA signal in B was standardized to protein concentration as determined by a Bradford assay. Significance in B was calculated by two-way ANOVA followed by Tukey multiple comparisons test. ns = no significance ( $p \geq 0.05$ ) across treatment groups.

630

631

632

633

634

635

636

637

638

639

640
